# Supplementary material
Source: MDPI journal article supplement (https://www.mdpi.com/2073-4441/12/5/1408)
Supplement: s1 [file s1]

# Supplement

Here, we explain more detail about how the three methods work to access the ecological water quality using macroinvertebrate community.

Method 1, miniSASS is a community monitoring tool for river health designed by The Water Research Commission of South Africa ([www.minisass.org](http://www.minisass.org)) based on Stream Assessment Scoring System (SASS) (Graham, Dickens, and Taylor 2004). Chutter (1998) developed SASS by adjusting and modifying the Biological Monitoring Working Party (BMWP) score system as an abiotic index for South Africa (Ollis 2005). The individual sensitivity score ranges from 2 to 17 for 12 taxonomic groups (see in <http://www.minisass.org/en/map/>). They identify water quality conditions into five categories; the natural or unmodified condition (>7.2), good or few modifications condition (from 6.2 to 7.2), fair or moderately modified state (from 5.7 to 6.1), poor or largely altered state (from 5.3 to 5.6), and very poor or severely altered condition (<5.3) based on average score per taxon, ASPT.

Method 2, is The Asia Foundation method was developed as a Community Water Quality Monitoring (WQM) method by The Asia Foundation organization (<http://asiafoundation.org/>). This method included 45 taxonomic groups with the range of individual sensitivity score value from 1 to 10. The water quality level divided into four groups based on the Ecological Water Quality Index; average score per taxon ASPT (as described below) 1 to 2.9 means “Poor quality,” 3.0 to 6.9 means “Fair quality,” and 7.0 to 10.0 means “Good quality.”

Method 3, involved the use of the Australian Waterwatch Water bug detective guide (<http://www.waterwatch.org.au/>) developed by the state governments primarily for use by citizens to determine waterway health. They used (Stream Invertebrate Great Number Average Level) SIGNAL 2 (Chessman 2003) to establish individual score per taxon which range from 1 to 10. It has 30 taxonomic groups to identify four-stream pollution indices; less than three means “Poor,” between 3 and 4, and between 4 and 6 mean “Fair” and “Good,” and more than 6 are “Excellent” water quality condition.

We calculated the ecological water quality index of rivers with the sum of the individual score of collected taxa divided by the total number of those taxa as the following equation of method 1 and 2.

However, the Australian Waterwatch method takes into account the abundance of taxa present (See in <https://www.nswwaterwatch.org.au/resources>). Therefore, we calculated the ecological water quality index with the following equation for Australian Waterwatch method.

where; weight factors range from 1 to 5 based on the number of abundances found. The weight factors reached 1 for one or two taxa, 2 for 3 or 5 individuals, 3 for between 6 and 10 individuals, 4 for between 11 and 20 individuals, and 5 for greater than 20 individuals.

The statistical program PRIMER v6 (based on the manual by (Clarke and Gorley 2006)).

To test the applicability of the three international methods for use in Myanmar rivers, we used the statistical analysis program PRIMER v6 (K R Clarke & Gorley, 2006) based on the similarity profile (Clarke et al., 2008) (Figure 1). We constructed an indices matrix without any transformation. We computed the resemblance matrix using Bray-Curtis similarity with the following equation to determine if the indices gave significantly different results among sampling sites.

where, and are the count of indices for ith species from sample 1 and sample 2 (Clarke & Gorley, 2006).

Non-metric multidimensional scaling (MDS) was used to display rank order correlation plots with a corresponding stress value. The MDS plot shows rank order distance among samples (dis)similarity calculated by Bray-Curtis (Clarke, 1993). The stress value gives the goodness of fit of the rank order correlation distance among the sample similarity in ordination space (Clarke & Gorley, 2006). Clarke (1993) noted that stress<0.05 is a near-perfect representation of ordination space. Similarity analysis (ANOSIM) and (SIMPER) were carried out using the resemblance matrix created using Bray-Curtis similarity.

We used one-way analysis of similarity (ANOSIM) to test the null hypothesis of no indices differences among all sampling sites. ANOSIM is the multivariate equivalent to the univariate Analysis of Variance (ANOVA) (Clarke and Warwick, 2001). Indeed, ANOSIM was used to look at the individual data among sampling sites whether all indices give the same pattern or not. The statistical coefficient Global R-value, highlights variables separations between the sites (Clarke & Gorley, 2006) with R-value between 0 to 1. If ANOSIM R statistic is close to its maximum range of 1 that shows there is very good clear separation of the creeks and highly significant different from the hull hypothesis. Likewise, if R statistic is minimum value of zero shows there is no creek difference and the null hypothesis (R=0) is correct (Clarke & Gorley, 2006).

SIMPER analysis was used to analyse the percentage of (dis)similarity between indices variable as a function of sampling sites within the same river, and between different rivers. More importantly, SIMPER computes the contribution of each indexing method. These contributions were used to show which variables (Indexing methods) support the percentage of (dis)similarity.

All statistical significance of Bray-Curtis, ANOSIM, and SIMPER were performed by 999 random permutations. Use of 999 random starts is a statistical requirement to allow probability at 0.001 level of chance outcome to be determined (Clarke & Gorley, 2006). Usually, statistical outcomes are accessed at the probability level of 0.05, 0.01, and 0.001 for valid statistical purpose (Greenland et al., 2016). The schematic diagram in Figure 1 demonstrates the structure of similarity analysis (using Bray-Curtis, MDS, ANOSIM and SIMPER) by PRIMER v6 statistical program in this current study based on the similarity profiles by Clarke, *et al*., (2008).


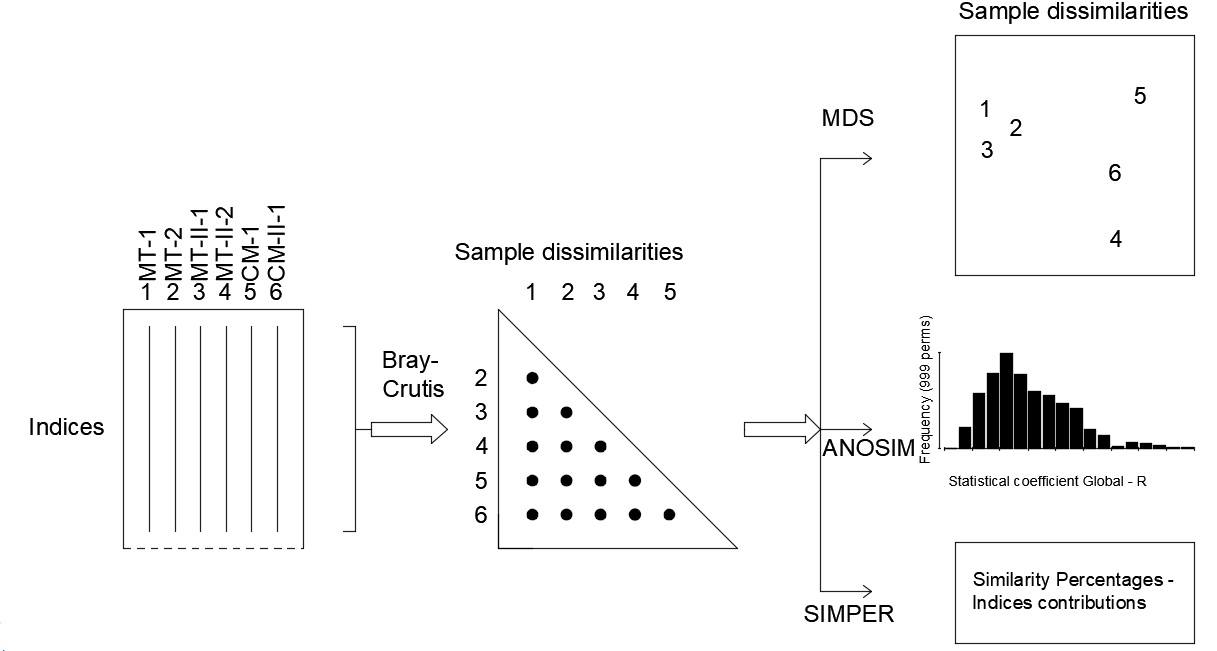


**Figure S1 The statistical analysis of current research by PRIMER v6 based on the similarity p**rofile by (Clarke et al., 2008)**.**

To find which indexing method is the most likely to be appropriate for use in Myanmar, we used the Biota and Environment matching routine (BEST) from PRIMER v6. BEST (Bio-Env) routine links biota (taxa data) to environment data (in this case the index data) (Clarke, 1993). We show how BEST works to give the rank correlation between taxa data and indices in Figure 2 based on the procedure by (Clarke *et al*. 2008). For taxa data, a triangular matrix of resemblances between samples was calculated using Bray-Curtis similarity. For index data, resemblances matrix was calculated using Euclidean distance.

Then, BEST (Bio-Env) estimates the rank correlation between these two resemblance matrices (taxa and indices) (Clarke, 1993). BEST works to find the best subset of Indexing method variables which show a strong correlation between biotic resemblance matrix and the Euclidean distance matrix for the indices. We applied the 99 random permutations (probability of 0.01) for the null distribution to find the optimal rank correlation values.


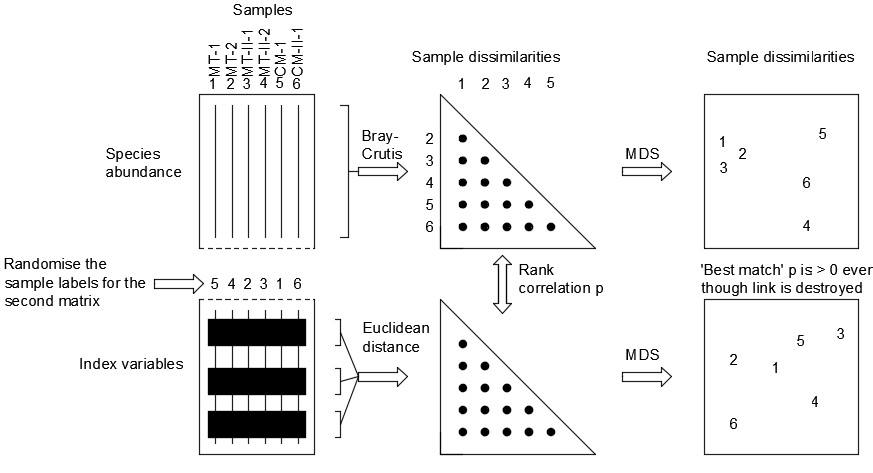


**Figure S2 The modified working procedure of BEST test anal**ysis after Clarke et al., (2008)**.**
